# Supplementary material for: Clinical Considerations and Outcomes for Spine Surgery Patients with a History of Transplant: A Systematic Scoping Review Protocol
Source: MDPI journal article supplement (doi:10.3390/mps5030047), 2022-06-05
Supplement: s1 [file s1]

Supplemental Table S1. Search Criteria

**Ovid MEDLINE® and Epub Ahead of Print, In-Process, In-Data-Review and Other Non-Indexed Citations, Daily and Versions® 1946 to 29 July 2021—323 Results**

1. exp Organ Transplantation/
2. exp bone marrow transplantation/
3. ((Organ or heart or liver or kidney or pancreas or heart-lung or bone marrow) adj3 (transplant\* or graft\*)).mp.
4. or/1-3
5. Lumbar Vertebrae/su [Surgery]
6. Spine/su [Surgery]
7. Cervical Vertebrae/su [Surgery]
8. Thoracic Vertebrae/su [Surgery]
9. Intervertebral Disc/su [Surgery]
10. exp Decompression, Surgical/
11. Laminoplasty/
12. exp Arthrodesis/
13. ((Spine or spinal or vertebra\* or intervertebral disc\* or intervertebral disk\*) adj3 surg\*).mp.
14. (Dissectom\* or discectom\*).mp.
15. Laminectom\*.mp.
16. Laminoplast\*.mp.
17. Surgical decompression\*.mp.
18. decompression surg\*.mp.
19. Arthrodes\*.mp.
20. ((Spine or spinal) adj fusion\*).mp.
21. or/5-20
22. 4 and 21
23. (animal\*.hw. or exp animal/) not human/
24. 22 not 23

**Embase Classic and Embase 1947 to 29 July 2021—786 results**

1. exp Organ Transplantation/
2. bone marrow transplantation/
3. ((Organ or heart or liver or kidney or pancreas or heart-lung or bone marrow) adj3 (transplant\* or graft\*)).mp.
4. or/1-3
5. lumbar vertebra/su [Surgery]
6. spine/su [Surgery]
7. intervertebral disk/su [Surgery]
8. exp decompression surgery/
9. Laminoplasty/
10. exp Arthrodesis/
11. exp discectomy/
12. ((Spine or spinal or vertebra\* or intervertebral disc\* or intervertebral disk\*) adj3 surg\*).mp.
13. (Discectom\* or discectom\*).mp.
14. Laminectom\*.mp.
15. Laminoplast\*.mp.
16. Surgical decompression\*.mp.
17. decompression surg\*.mp.
18. Arthrodes\*.mp.
19. ((Spine or spinal) adj fusion\*).mp.
20. or/5-19
21. 4 and 20
22. (animal\*.hw. or exp animal/) not human/
23. 21 not 22

**Cochrane CENTRAL—609 results**

1. MeSH descriptor: [Organ Transplantation] explode all trees
2. MeSH descriptor: [Bone Marrow Transplantation] explode all trees
3. ((organ OR heart OR liver OR kidney OR pancreas OR heart-lung OR bone marrow) NEAR/3 (transplant\* OR graft\*)):ti,ab,kw
4. #1 OR #2 OR #3
5. MeSH descriptor: [Lumbar Vertebrae] this term only and with qualifier(s): [surgery - SU]
6. MeSH descriptor: [Spine] this term only and with qualifier(s): [surgery - SU]
7. MeSH descriptor: [Cervical Vertebrae] this term only and with qualifier(s): [surgery - SU]
8. MeSH descriptor: [Thoracic Vertebrae] this term only and with qualifier(s): [surgery - SU]
9. MeSH descriptor: [Intervertebral Disc] this term only and with qualifier(s): [surgery - SU]
10. MeSH descriptor: [Decompression, Surgical] explode all trees
11. MeSH descriptor: [Laminoplasty] this term only
12. MeSH descriptor: [Arthrodesis] explode all trees
13. ((Spine OR spinal OR vertebra\* OR intervertebral disc\* OR intervertebral disk\*) NEAR/3 surg\*):ti,ab,kw
14. (Dissectom\* OR discectom\*):ti,ab,kw
15. (Laminectom\*):ti,ab,kw
16. (Laminoplast\*):ti,ab,kw
17. (Surgical decompression\*):ti,ab,kw
18. (decompression surg\*):ti,ab,kw
19. (Arthrodes\*):ti,ab,kw
20. ((Spine OR spinal) NEAR fusion\*):ti,ab,kw
21. {OR #5-#20}
22. #4 AND #21 in Trials
